# Supplementary material for: Cellular Response of Adapted and Non-Adapted Tetrahymena thermophila Strains to Europium Eu(III) Compounds
Source: MDPI journal article supplement (doi:10.3390/biology13050285), 2024-04-23

## Supplementary material

**Table S1.** Sequences and features of the primers used in the qRT-PCR analysis.

| Primers <sup>(1)</sup> | Length (b) | %(G+C) | Tm (°C) | Sequences (5 → 3')                 |
|------------------------|------------|--------|---------|------------------------------------|
| TtACT1                 | 22         | 40.9   | 52.8    | CTC TCT TTC TAC CTT CCA AAC T      |
| TtACT2                 | 21         | 38.1   | 52.1    | AGG ACC AGA TTC ATC ATA TTC        |
| TtCATA                 | 21         | 47.62  | 54.9    | GCT TTC TCT CCT TCC CAC TTA        |
| TtCATB                 | 21         | 47.62  | 54.3    | TCT GTG GGT ATC GGG ATA AGA        |
| TtGR1A                 | 16         | 43.75  | 36      | ACT TAG ACA GGT GAA C              |
| TtGR1B                 | 16         | 50     | 38      | ACT CAA GGT TAA CGC C              |
| TtGCLA                 | 24         | 33.33  | 56      | AGA ATT CAG AAC TAT GGA ATG CTA    |
| TtGCLB                 | 20         | 45     | 57      | ATG AAA GCA GCG TTC TCA TC         |
| MTT1QA                 | 26         | 34.6   | 53.6    | ATG GAT AAA GTT AAT AGC TGT TGC TG |
| MTT1QB                 | 17         | 47.1   | 49.6    | AAA GCA GCA GGG TTT AG             |
| MTT2/4QA               | 17         | 41.2   | 46.7    | ATG CAA ATG TGG ATC TC             |
| MTT2/4QB               | 17         | 47.1   | 46.6    | CAG TTG GAA GTA GAA CC             |
| MTT3QA                 | 17         | 29.4   | 43.4    | ACA ATG TAA TTG TGC TT             |
| MTT3QB                 | 17         | 41.2   | 48      | TAA GCA GCT GGA TTT GA             |
| MTT5QA                 | 21         | 52.4   | 57.8    | TGT GTC GGT TCA GGA GAA GGA        |
| MTT5QB                 | 23         | 43.5   | 57      | AGG TCC GCA TTT ACA TTC AGC TT     |
| TtSODCuA               | 23         | 43.48  | 54.4    | GAT GAT TTA GGT AGA GGC AAC CA     |
| TtSODCuB               | 22         | 40.91  | 54.3    | AGC AAG TCC AAT AAT ACC AGC A      |
| TtSODFeA               | 22         | 45.45  | 54.3    | CCT CAC CAA GGC CAT ATA AGA A      |
| TtSODFeB               | 20         | 45     | 54.9    | AGT GTC ATA ACL GAG CCA AC         |
| TtGSTM3A               | 20         | 50     | 47      | CTA TAG GAG CTG GGA TCA CT         |
| TtGSTM3A               | 19         | 42.11  | 42      | GAA AAA GCA CCA TGA TAC C          |
| TtGSTZ2A               | 19         | 42.11  | 42      | CAG TGC TAT TCA TCC CTA T          |
| TtGSTZ2B               | 19         | 31.58  | 37      | TCA TAT TGC CTT CTT TTT C          |
| TtTR2A                 | 19         | 26.67  | 44      | CTA AGT AAG TAG TT A               |
| TtTR2B                 | 20         | 26.32  | 45      | TAT CTT TAT CTG ATA GTA C          |
| TtTR5A                 | 21         | 38.1   | 52      | TTT GCA ATA GGA GAT GCT GTT        |
| TtTR5B                 | 21         | 42.86  | 52      | CCC TTA TTT TAT TGC CAC AGG        |

<sup>(1)</sup> TtACT1/2: Beta-actin, TtCATA/B: Catalase, TtGR1A/B: glutathione reductase, TtGCLA/B: glutathione cysteinyl ligase, MTT1QA/B: MTT1 metallothionein, MTT2/4QA/B: MTT2/MTT4 metallothioneins, MTT3QA/B: MTT3 metallothionein, MTT5QA/B: MTT5 metallothionein. TtSODCuA/B: CuZn-superoxide dismutase, TtSODFeA/B: Fe-superoxide dismutase, TtGSTM3A/B: M3 glutathione transferase, TtGSTZ2A/B: Z2 glutathione transferase, TtTR2A/B: thioredoxin reductase 2, TtTR5A/B: thioredoxin reductase 5.

**Table S2.** Quantitative RT-PCR standard-curve parameters.

| <b>Gene</b>     | <b>S<sup>(1)</sup></b> | <b>E (%)<sup>(1)</sup></b> | <b>Y-intercept</b> | <b>R<sup>2</sup> <sup>(1)</sup></b> |
|-----------------|------------------------|----------------------------|--------------------|-------------------------------------|
| <i>β-actin</i>  | -3.266                 | 102.30                     | 16.714             | 0.997                               |
| <i>MTT1</i>     | -3.068                 | 111.80                     | 16.304             | 0.998                               |
| <i>MTT2/4</i>   | -3.123                 | 108.99                     | 17.953             | 0.998                               |
| <i>MTT3</i>     | -3.506                 | 92.85                      | 10.022             | 0.992                               |
| <i>MTT5</i>     | -3.602                 | 89.51                      | 7.897              | 0.955                               |
| <i>GCL</i>      | -3.252                 | 103.00                     | 15.123             | 0.998                               |
| <i>GSTM3</i>    | -3.667                 | 87.37                      | 18.171             | 0.991                               |
| <i>GSTZ2</i>    | -3.861                 | 81.55                      | 19.725             | 0.996                               |
| <i>CAT</i>      | -3.168                 | 106.81                     | 20.01              | 0.989                               |
| <i>CuZn-SOD</i> | -3.235                 | 103.74                     | 15.59              | 0.991                               |
| <i>Fe-SOD</i>   | -3.392                 | 97.12                      | 11.419             | 0.998                               |
| <i>TRX5</i>     | -3.722                 | 85.64                      | 19.807             | 0.983                               |
| <i>TRX2</i>     | -3.517                 | 92.43                      | 16.797             | 0.977                               |
| <i>GR1</i>      | -3.209                 | 104.92                     | 18.722             | 0.988                               |

<sup>(1)</sup> Slope (S), amplification efficiency (E), correlation coefficient (R<sup>2</sup>).

**Figure S1.** Dose-mortality curves. (A):  $\text{EuCl}_3$  treatments. (B):  $\text{Eu}_2\text{O}_3$  treatments. Histograms: (A1, A3, B1 and B3). Adjusted model with 95% confidence intervals: (A2, A4, B2 and B4)

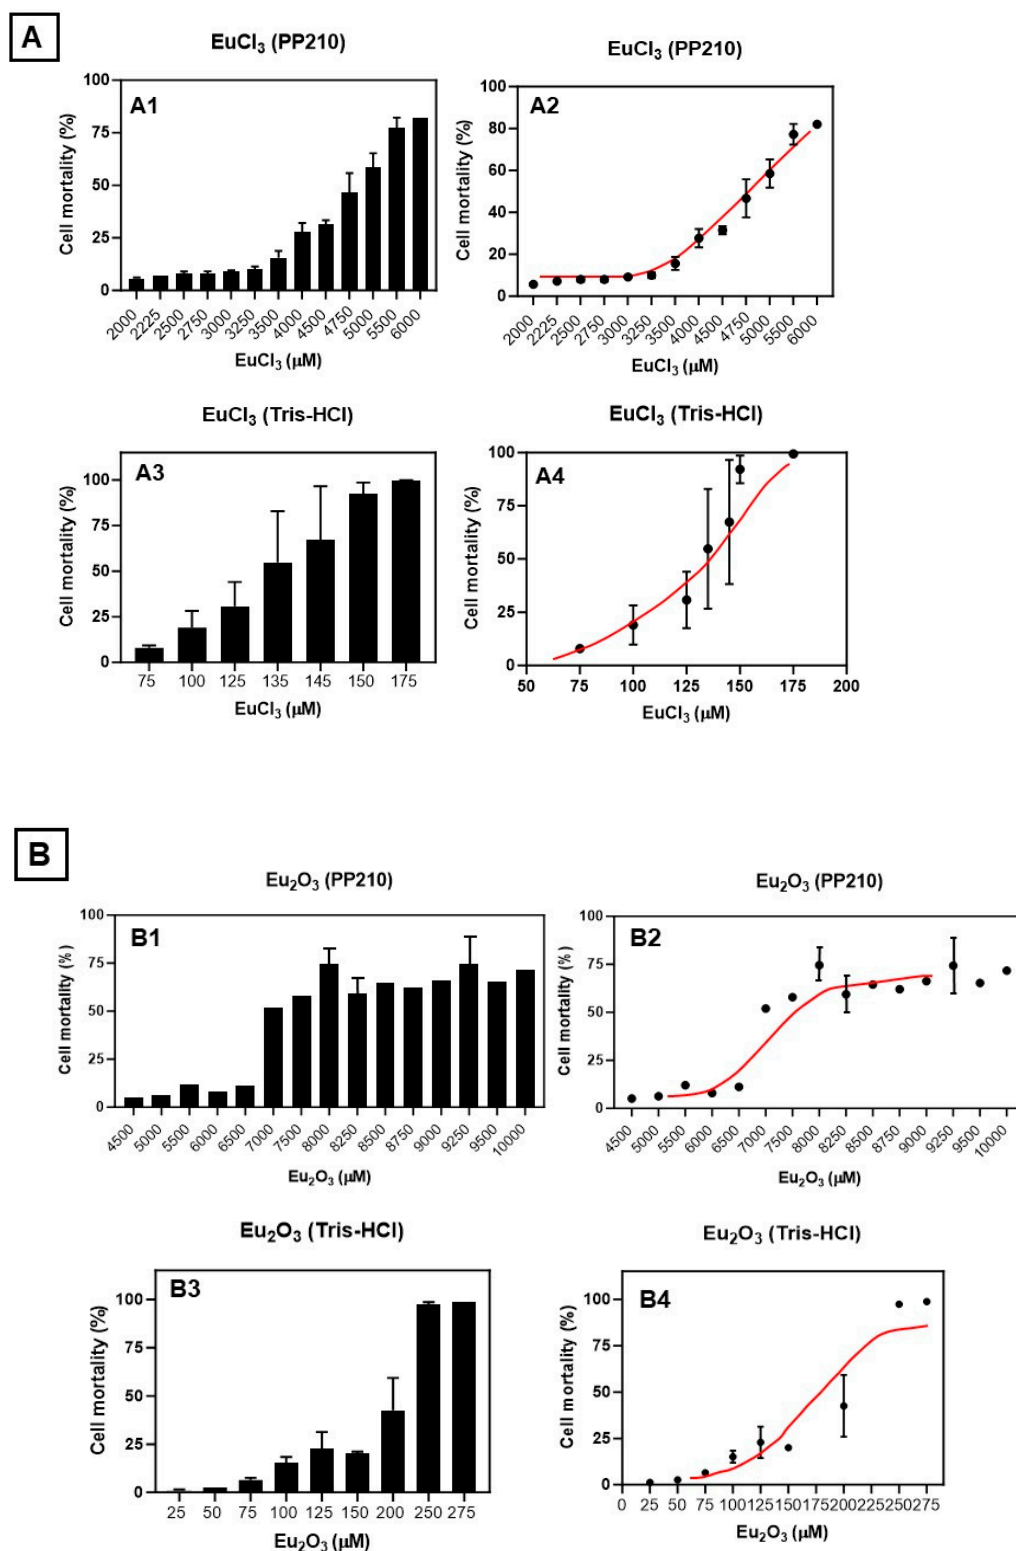

Supplement: s1 [file s1]
